# Supplementary material
Source: MDPI journal article supplement (https://www.mdpi.com/2076-0760/11/3/122)
Supplement: s1 [file s1]

## Supplementary Materials

**Table S1.** Summary of ADC Moura's activities. Source: author's own elaboration based on ADC Moura's Report of Activities and Accounts (2019).

| Projects and provision of services                                                                                     | ADC Moura's area of action                                     | Financing                                                                  | Axes of intervention | Role                   |
|------------------------------------------------------------------------------------------------------------------------|----------------------------------------------------------------|----------------------------------------------------------------------------|----------------------|------------------------|
| <b>Project activity of ADC Moura</b>                                                                                   |                                                                |                                                                            |                      |                        |
| RurAction - Social Entrepreneurship in Structurally Weak Rural Regions: Analysing Innovative Troubleshooters in Action | Innovation in rural environment                                | Horizon 2020                                                               | 3                    | Partner                |
| My Smart Quartier                                                                                                      | Digital citizenship                                            | Erasmus + K2                                                               | 2, 4                 | Partner                |
| Spechale - SPEcialists in Cultural Heritage and Attractive Living Environment                                          | Innovative training in culture and tourism                     | Erasmus + K2                                                               | 3, 4                 | Lead Partner           |
| Kus Kus - Backing Entrepreneurial Initiatives in the Culinary Sector                                                   | Kitchens of the world                                          | Erasmus + K2                                                               | 3, 4                 | European Expert Member |
| EPAM - Business development in the aromatic and medicinal plant sector in Portugal                                     |                                                                |                                                                            |                      |                        |
| Inov@sfileiras - Innovative Chains                                                                                     | Emerging agricultural value chains                             | Rural Development Program 2020 (PDR 2020)                                  | 3                    | Project Lead           |
| Provere - Valorization of the Alentejo's Wild Resources                                                                | Wildlife resources                                             | Alentejo 2020                                                              | 3                    | Promoting Entity       |
| Despert@rte E7G                                                                                                        | Support to Roma children and young people and social inclusion | Social Inclusion and Employment Operational Program (POISE), Portugal 2020 | 2                    | Beneficiary            |
| CCPAM – Centre of Competence on Aromatic, Medicinal and Culinary Herbs                                                 | Medicinal and aromatic plant                                   | Rural Development                                                          | 3                    | Project Lead           |

|                                                                              |                                                 |                                                             |   |                  |
|------------------------------------------------------------------------------|-------------------------------------------------|-------------------------------------------------------------|---|------------------|
|                                                                              | research                                        | Program 2020<br>(PDR 2020)                                  |   |                  |
| COOP4PAM - Cooperation for Growth in the Aromatic and Medicinal Plant Sector | Social inclusion                                | INTERREG V – A (POCTEP)                                     | 3 | Partner Entity   |
| Mediadores Municipais - Municipal Mediators                                  | PAM cooperation and research                    | Social Inclusion and Employment Operational Program (POISE) | 2 | Partner          |
| Passeurs de Culture                                                          | Local products                                  | ERASMUS+ K1                                                 | 3 | Partner          |
| <b>Provision of services by ADC Moura</b>                                    |                                                 |                                                             |   |                  |
| ATCP - Technical Support for the Creation and Consolidation of Projects      | Support for the initiative                      | Institute of Employment and Professional Training (IEFP)    | 5 | Service Provider |
| Orçamento Participativo - Participatory Budget                               | Citizen participation                           | Municipality of Moura (CMMoura)                             | 2 | Partner          |
| COOPERA_RS - Cooperation for Wild Resources                                  | Medicinal and aromatic plant sector events      | Local Action Group ESDIME                                   | 3 | Service Provider |
| Apoio a Cursos de Formação - Support and Courses for Training                | Qualification/ support for training and courses | Various sources                                             | 2 | Service Provider |
